# Supplementary figures and images for: Body Composition as a Predictor of the Survival in Anal Cancer
Source: MDPI journal article supplement (doi:10.3390/cancers14184521), 2022-09-18

Suppl. Figures

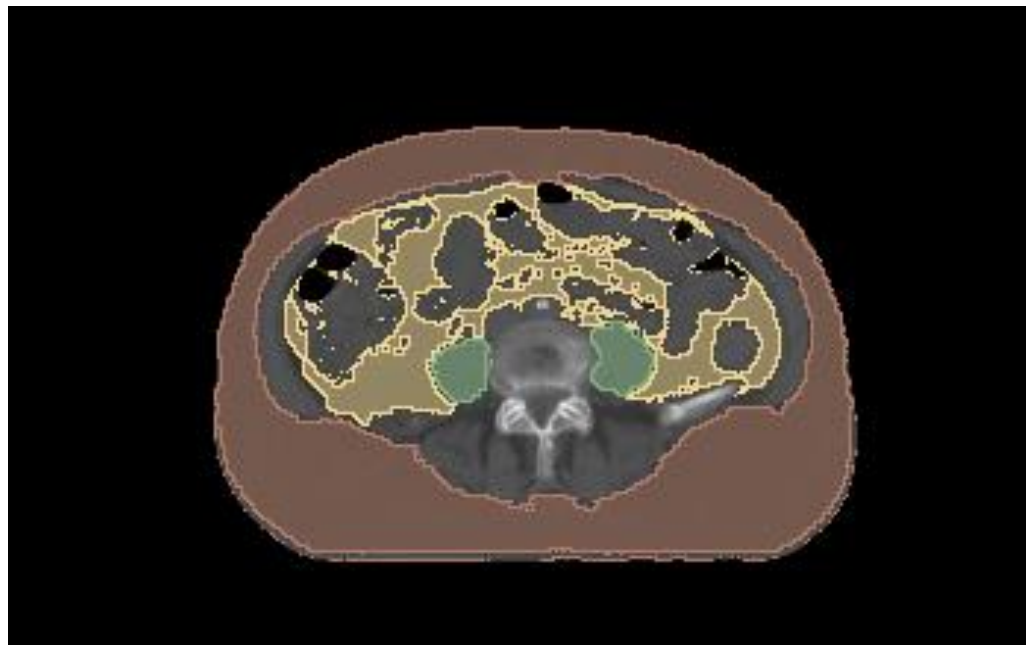

Suppl. Figure S1: representative CT slide at the level of L4-5.

Supplement: s1 [file s1]
